# Supplementary material
Source: MDPI journal article supplement (https://www.mdpi.com/2073-4441/14/19/3099)
Supplement: s1 [file s1]

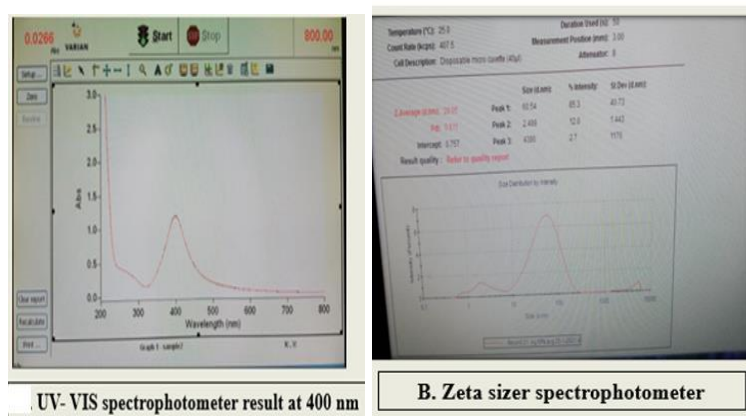

**Figure S1.** Characterization of silver nanoparticles via: UV- VIS spectrophotometer and Zeta sizer.

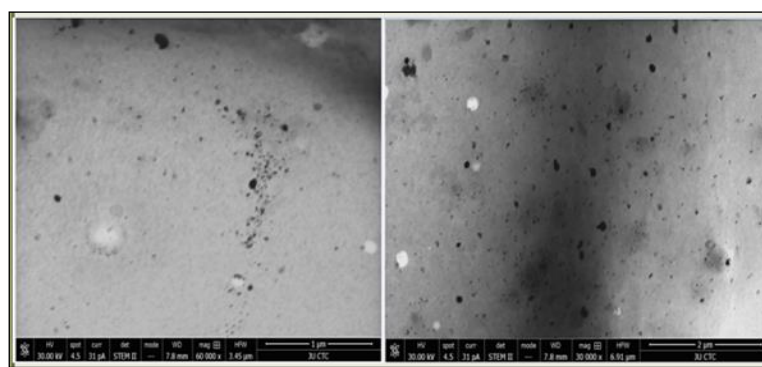

**Figure S2.** Photos of Ag NPs characterization via transmission electron microscope (TEM).
